# Supplementary material
Source: PubMed Central journal article supplement (PMC6451511)
Supplement: ejhpharm-2015-000818supp001.pdf [file ejhpharm-2015-000818supp001.pdf]

Supplementary Table 1 Antimicrobial resistance pattern of *E. coli* during 1<sup>st</sup> October 2012- 30<sup>th</sup> September 2014 for all the indications studied

| Antibiotics                 | 1 <sup>st</sup> Oct 2012-<br>30 <sup>th</sup> Sep 2013        | 1 <sup>st</sup> Oct 2013-30 <sup>th</sup> Sep<br>2014 | p value |
|-----------------------------|---------------------------------------------------------------|-------------------------------------------------------|---------|
|                             | No. isolates resistant/ No. isolates tested<br>(% resistance) |                                                       |         |
| Amikacin                    | 2/36 (5)                                                      | 10/41 (24)                                            | 0.029   |
| Amoxicillin-clavulanic acid | 31/35 (88)                                                    | 34/41 (83)                                            | 0.532   |
| Ampicillin- sulbactam       | 23/31 (74)                                                    | 32/40 (80)                                            | 0.561   |
| Cefixime                    | 28/34 (82)                                                    | 34/40 (85)                                            | 0.758   |
| Cefoperazone                | 29/29 (100)                                                   | 32/32 (100)                                           | -       |
| Cefoperazone- sulbactam     | 4/30 (13)                                                     | 14/34 (41)                                            | 0.024   |
| Cefotaxime                  | 8/8 (100)                                                     | 6/6 (100)                                             | -       |
| Ceftriaxone                 | 31/36 (86)                                                    | 31/40 (77)                                            | 0.335   |
| Ciprofloxacin               | 28/37 (76)                                                    | 32/39 (82)                                            | 0.495   |
| Colistin                    | 0/2 (0)                                                       | 1/15 (7)                                              | -       |
| Cotrimoxazole               | 14/33 (42)                                                    | 20/30 (67)                                            | 0.053   |
| Gentamicin                  | 18/37 (49)                                                    | 25/41 (61)                                            | 0.274   |
| Levofloxacin                | 17/31 (55)                                                    | 31/39 (79)                                            | 0.027   |
| Meropenem                   | 0/7 (0)                                                       | 5/23 (22)                                             | 0.304   |
| Nitrofurantoin              | 0/17 (0)                                                      | 8/19 (42)                                             | 0.003   |
| Norfloxacin                 | 13/17 (76)                                                    | 12/17 (70)                                            | 1       |
| Ofloxacin                   | 11/15 (73)                                                    | 14/18 (78)                                            | 1       |
| Piperacillin- tazobactam    | 5/29 (17)                                                     | 16/34 (47)                                            | 0.025   |
| Ticarcillin-clavulanic acid | 15/28 (53)                                                    | 21/29 (72)                                            | 0.14    |

Supplementary Table 2 Antimicrobial resistance pattern of *K. pneumoniae* during 1<sup>st</sup> October 2012-30<sup>th</sup> September 2014)

| Antibiotics                 | 1 <sup>st</sup> Oct 2012-<br>30 <sup>th</sup> Sep 2013        | 1 <sup>st</sup> Oct 2013-30 <sup>th</sup> Sep<br>2014 | p value |
|-----------------------------|---------------------------------------------------------------|-------------------------------------------------------|---------|
|                             | No. isolates resistant/ No. isolates tested<br>(% resistance) |                                                       |         |
| Amikacin                    | 4/14 (28)                                                     | 19/37 (51)                                            | 0.210   |
| Amoxicillin-clavulanic acid | 11/14 (78)                                                    | 34/35 (97)                                            | 0.065   |
| Ampicillin sulbactam        | 11/14 (78)                                                    | 34/35 (97)                                            | 0.065   |
| Cefixime                    | 9/13 (69)                                                     | 32/37 (86)                                            | 0.213   |
| Cefoperazone                | 9/9 (100)                                                     | 30/31 (97)                                            | 1       |
| Cefoperazone- sulbactam     | 4/11 (36)                                                     | 28/34 (82)                                            | 0.006   |
| Cefotaxime                  | 2/2 (100)                                                     | 5/5 (100)                                             | -       |
| Ceftriaxone                 | 10/14 (71)                                                    | 33/37 (89)                                            | 0.192   |
| Ciprofloxacin               | 8/13 (61)                                                     | 32/36 (89)                                            | 0.043   |

|                             |           |             |       |
|-----------------------------|-----------|-------------|-------|
| Colistin                    | 0         | 0           | -     |
| Cotrimoxazole               | 6/12 (50) | 19/21 (90)  | 0.015 |
| Gentamicin                  | 8/14 (57) | 23/36 (64)  | 0.750 |
| Levofloxacin                | 5/10 (50) | 25/37 (67)  | 0.460 |
| Meropenem                   | 3/6 (50)  | 20/30 (67)  | 0.645 |
| Nitrofurantoin              | 3/7 (42)  | 23/30 (77)  | 0.163 |
| Norfloxacin                 | 7/8 (87)  | 16/16 (100) | 0.333 |
| Ofloxacin                   | 7/8 (87)  | 13/13 (100) | 0.381 |
| Piperacillin- tazobactam    | 4/11 (36) | 27/34 (79)  | 0.020 |
| Ticarcillin-clavulanic acid | 8/10 (80) | 24/28 (86)  | 0.644 |

**PROPOSED ANTIBIOTIC POLICY FOR GASTROENTEROLOGY DEPARTMENT, AIMS, BASED ON CULTURE AND SENSITIVITY  
PATTERN OF BACTERIAL ISOLATES OBTAINED IN VARIOUS INFECTIONS**

| Sl. No. | Clinical condition/<br>Diagnosis                                                                                                                                                                 | Common causative agents                                   | Treatment with dose and duration                                                                                                                                                   | Comments                                                                                                                                                                                                                                                                                                                                                                                                                                                                                                                                                                                                                                                                                                                                                                   |
|---------|--------------------------------------------------------------------------------------------------------------------------------------------------------------------------------------------------|-----------------------------------------------------------|------------------------------------------------------------------------------------------------------------------------------------------------------------------------------------|----------------------------------------------------------------------------------------------------------------------------------------------------------------------------------------------------------------------------------------------------------------------------------------------------------------------------------------------------------------------------------------------------------------------------------------------------------------------------------------------------------------------------------------------------------------------------------------------------------------------------------------------------------------------------------------------------------------------------------------------------------------------------|
| 1       | <b>Spontaneous bacterial peritonitis (SBP)</b><br><br>(Ascitic fluid PMN count $\geq 250$ cells/mm <sup>3</sup> without an evident intra-abdominal or surgically treatable source of infection ) | <i>Escherichia coli</i> ,<br><i>Klebsiella pneumoniae</i> | Inj. cefoperazone-sulbactam*<br>2gm BD for 5 days.<br><br><b>Alternative regimens:</b><br>Inj. Piperacillin tazobactam*<br>4.5gm TID<br>or<br>Inj. Amikacin*<br>5-7.5mg/kg/day TID | <ul style="list-style-type: none"> <li>• <i>E. coli</i> was the causative bacteria in SBP for 39.2% of cases and <i>K. Pneumoniae</i> in 13.7% of cases.</li> <li>• 65% of <i>E. coli</i> isolates and 60% of <i>klebsiella</i> isolates were found to be susceptible to Cefoperazone- sulbactam.</li> <li>• Though the susceptibility of <i>E. coli</i> and <i>K. pneumoniae</i> to amikacin was 74 and 87% respectively, it was suggested as alternative regimen because of its renal toxicity and the need to adjust the dose as per the degree of renal impairment.</li> <li>• <i>E. coli</i> and <i>K. pneumoniae</i> showed &gt;50% resistance towards cephalosporins [cefixime, ceftriaxone, cefoperazone and cefotaxime] except cefoperazone-sulbactam.</li> </ul> |
| 2       | <b>Cholangitis</b>                                                                                                                                                                               | <i>Escherichia coli</i> ,<br><i>Klebsiella pneumoniae</i> | Inj. cefoperazone- sulbactam*<br>2gm BD<br><br><b>Alternative regimens:</b> If no improvement in 48 hrs changed to Inj. Meropenem*<br>1gm q8h                                      | <ul style="list-style-type: none"> <li>• 47.6% of infections in cholangitis caused by <i>E. coli</i> and 27.6% caused by <i>K. pneumoniae</i></li> <li>• Cefoperazone -sulbactam has sufficient anti anaerobic activity also.</li> <li>• Though aminoglycosides have high sensitivity, their biliary penetration is poor [&lt;10%].</li> <li>• 61% of <i>E. coli</i> isolates and 28% of <i>K. pneumoniae</i> isolates were susceptible to cefoperazone - sulbactam.</li> <li>• Though the susceptibility of meropenem to <i>E. coli</i> was 82% and <i>K. Pneumoniae</i> 45, it is suggested as a second line agent because its use is restricted to prevent emergence of resistance.</li> </ul>                                                                          |

|   |                                                             |                                                         |                                                                                                                                                                         |                                                                                                                                                                                                                                                                                                                                                                                                                                                                                                                            |
|---|-------------------------------------------------------------|---------------------------------------------------------|-------------------------------------------------------------------------------------------------------------------------------------------------------------------------|----------------------------------------------------------------------------------------------------------------------------------------------------------------------------------------------------------------------------------------------------------------------------------------------------------------------------------------------------------------------------------------------------------------------------------------------------------------------------------------------------------------------------|
| 3 | <b>Cholecystitis</b>                                        | <i>Escherichia coli</i>                                 | Inj. Piperacillin-tazobactam*<br>4.5gm q8h<br>Or<br>Inj cefoperazone- sulbactam*<br>2gm BD                                                                              | <ul style="list-style-type: none"> <li>The duration should be tailored as per clinical improvement.</li> <li>66.6 % of infection in cholecystitis caused by <i>E coli</i>.</li> <li><i>E. Coli</i> shows 100% sensitivity to inj. Piperacillin-tazobactam and inj. Cefoperazone-sulbactam.</li> <li>Gall bladder and bile cultures should be sent in all cases of acute cholecystitis except Grade I.</li> </ul>                                                                                                           |
| 4 | <b>Pancreatitis</b>                                         | <i>K. pneumoniae</i><br><i>E coli</i>                   | Inj. Ciprofloxacin* 400mg<br>q12h<br><br><b>Alternative regimen</b><br>Inj. Meropenem* 1gm q8h                                                                          | <ul style="list-style-type: none"> <li>25% of infections in pancreatitis was caused by <i>K. pneumoniae</i> and 16.6% caused by <i>E .coli</i>.</li> <li><i>Klebsiella</i> was 100% sensitive to meropenem and Ciprofloxacin while <i>E. Coli</i>.67% sensitive to meropenem</li> <li>Carbapenems, fluoroquinolones and metronidazole have high penetrating power into pancreatic necrotic tissue.</li> <li>Prophylactic antibiotic therapy not recommended.</li> </ul>                                                    |
| 5 | <b>Gastroenteritis</b>                                      | <i>Salmonella typhimurium</i>                           | Inj. Ciprofloxacin* 500mg BD<br><br><b>Alternative regimen</b><br>Inj. Ofloxacin* 500mg BD for<br>5-7 days                                                              | <ul style="list-style-type: none"> <li>All the isolates of gastroenteritis were <i>Salmonella typhimurium</i>.</li> <li>In healthy host with mild to moderate symptoms, no antimicrobial therapy needed as it encourages the proliferation and leads to the excretion of bacteria into the stool.</li> </ul>                                                                                                                                                                                                               |
| 6 | <b>Urinary tract infection associated with GI disorders</b> | <i>Escherichia coli</i><br><i>Klebsiella pneumoniae</i> | Inj. Cefoperazone- sulbactam*<br>2gm BD<br><b>Alternative regimen</b><br>Tablet Nitrofurantoin 100mg<br>BD for 7days (Not effective in<br>patients with Crcl<40ml/min.) | <ul style="list-style-type: none"> <li><i>E. coli</i> was the causative bacteria in 56.3% of UTI cases and 43.7% of cases caused by <i>K. pneumoniae</i>.</li> <li>89% of <i>E. coli</i> and 33% of <i>K.pneumoniae</i> were susceptible to nitrofurantoin</li> <li>Fluoroquinolones [ciprofloxacin, Ofloxacin and Gentamicin] shows &lt;50% of susceptibility.</li> <li>For complicated and recurrent UTI, inj. amikacin 250mg BD may be appropriate because it is more effective than cefoperazone-sulbactam.</li> </ul> |

\*The antibiotics need dosage adjustment in renal impairment
